# Supplementary material for: Neonatal Drug Formularies—A Global Scope
Source: MDPI journal article supplement (doi:10.3390/children10050848), 2023-05-08
Supplement: s1 [file s1]

## Parameters

- Is a drug monograph available?
- Dosage based on which parameter (weight/age/route of administration)?
- Is method of administration indicated?
- Number of routes of administration
- Number of age groups
- Number of indications (including general dosage)
- Differentiation between preterm and term patients
- Are monitoring advice and parameters indicated (if applicable)?
- Renal dosage adjustment (if applicable)
- Hepatic dosage adjustment (if applicable)
- Other dosage adjustments (if applicable)
- Drug-drug interactions mentioned?
- Adverse effects mentioned?
- If adverse effects are mentioned, are age-specific effects mentioned?
- Are preparation instructions available?
- Are stability data provided (if applicable)?
- Optimal concentration of preparation (if applicable)
- Maximum concentration of preparation (if applicable)
- Are Notable excipients mentioned?
- Are commercial products listed?
- Are pharmacokinetic data available?
