# Supplementary material for: Neonatal Drug Formularies—A Global Scope
Source: MDPI journal article supplement (doi:10.3390/children10050848), 2023-05-08
Supplement: s1 [file s1]

When was the formulary first published?

1. What format(s) is it published in?
  - a. Web-based
  - b. Mobile application
  - c. Print
2. Who is the target audience?
3. What language(s) is it published in?
4. Is it linked to a broader formulary (adults, children) or is it a standalone formulary?
5. What is the business model?
  - a. Individual subscription
  - b. Institutional subscription
  - c. Embedded in other applications
  - d. Free to some?
6. What is the frequency of updates?
  - a. Are there “major” updates and “minor” updates?
  - b. Are updates always scheduled, or does new evidence lead to an immediate update?
7. How are updates communicated to users?
8. How are drugs selected for inclusion?
  - a. How are drugs first identified for possible inclusion?
  - b. How is it determined when there is enough need and/or evidence for inclusion?
9. Who is involved in the development of a monograph?
  - a. Expertise
  - b. Hierarchy of decision making
10. What is the search process for literature support?
  - a. Are specific Pub Med terms used on all drugs?
  - b. Is there a “deeper dive” into references listed in the initial articles retrieved?
  - c. What is considered “best-evidence”?
  - d. How are expert panel recommendations utilized?
11. Is the dosing information evaluated differently than other sections of the monograph?
  - a. If there is not a single standard dose, are multiple doses mentioned versus a range?
12. Are extrapolations done from PK / PD data in children?
13. How is product labeling used in constructing the drug monograph?
  - a. What if the labeling does not mention neonates?
  - b. What if the labeling has a vague warning about use under a certain age?
  - c. How are black box warnings included in the monograph?

Any free text that the formulary ‘holders’ feel relevant to share
