# Supplementary material for: Neonatal Drug Formularies—A Global Scope
Source: Children (Basel). 2023 May 8;10(5):848. doi: 10.3390/children10050848 (PMC10217712; doi:10.3390/children10050848)
Supplement: Supplementary file 1 [file children-10-00848-s001.zip]

Archive with 5 entries (5 files):
- Document S1 - Questionnaire for the Formularies ver. 3.2.pdf
- Document S2 - Data Extraction Tool.pdf
- Document S3 - Summary of Key Aspects of Studied Formularies.pdf
- Document S4 - Data Extraction Table - formulary-specific - 11032023.xlsx
- Document S5 - Data Extraction Table - drug-specific - 11032023.xlsx
