# Supplementary material for: Neonatal Drug Formularies—A Global Scope
Source: Children (Basel). 2023 May 8;10(5):848. doi: 10.3390/children10050848 (PMC10217712; doi:10.3390/children10050848)
Supplement: Supplementary file 1 [file children-10-00848-s001.zip › Document S4 - Data Extraction Table - formulary-specific - 11032023.xlsx]

## Sheet: Neofax
Parameters	Ampicillin	Gentamicin	Caffeine	Poractant alfa	Morphine	Vancomycin	Furosemide	Fentanyl	Midazolam	Acetaminophen (paracetamol)
Is a drug monograph available?	Yes	Yes	Yes	Yes	Yes	Yes	Yes	Yes	Yes	Yes
Dosage based on which parameter (weight/age/route of administration)?	Weight and age	Weight and age	Weight	Weight	Weight	Weight, age, serum creatinine	Weight and age	Weight	Weight	Weight, age
Is method of administration indicated?	Yes	Yes	Yes	Yes	Yes	Yes	Yes	Yes	Yes	Yes
Number of routes of administration	2	2	2	1	4	2	3	1	5	3
Number of age groups	7	6	1	1	1	4	3	1	1	3
Number of indications (including general dosage)	6	3	2	1	5	6	3	3	3	2
Differentiation between preterm and term patients	Yes	Yes	N/A	No	No	Yes	Yes	No	No	Yes
Are monitoring advice and parameters indicated (if applicable)?	Yes	Yes	Yes	Yes	Yes	Yes	Yes	Yes	Yes	Yes
Renal dosage adjustment (if applicable)	No	No	Yes	N/A	No	Yes	N/A	No	No	No
Hepatic dosage adjustment (if applicable)	N/A	N/A	Yes	N/A	N/A	N/A	N/A	N/A	No	No
Other dosage adjustments (if applicable)	N/A	Yes	No	N/A	Yes	Yes	No	No	Yes	No
Drug-drug interactions mentioned?	No	No	No	No	No	No	No	No	No	No
Adverse effects mentioned?	Yes	Yes	Yes	Yes	Yes	Yes	Yes	Yes	Yes	Yes
If adverse effects are mentioned, are age-specific effects mentioned?	Yes	No	No	No	No	No	Yes	No	Yes	No
Are preparation instructions available?	Yes	No	Yes	Yes	Yes	Yes	Yes	Yes	Yes	No
Are stability data provided (if applicable)?	Yes	No	Yes	Yes	Yes	Yes	Yes	Yes	Yes	Yes
Optimal concentration of preparation (if applicable)	Yes	No	No	N/A	No	No	No	Yes	Yes	N/A
Maximum concentration of preparation (if applicable)	Yes	N/A	N/A	N/A	N/A	Yes	N/A	N/A	No	N/A
Are Notable excipients mentioned?	No	No	No	No	No	Yes	No	No	Yes	No
Are commercial products listed?	No	No	Yes	Yes	Yes	No	No	No	Yes	No
Are pharmacokinetic data available?	Yes	Yes	Yes	N/A	Yes	Yes	Yes	Yes	Yes	Yes

## Sheet: ANMF
Parameters	Ampicillin	Gentamicin	Caffeine	Poractant alfa	Morphine	Vancomycin	Furosemide	Fentanyl	Midazolam	Acetaminophen (paracetamol)
Is a drug monograph available?	Yes	Yes	Yes	Yes	Yes	Yes	Yes	Yes	Yes	Yes
Dosage based on which parameter (weight/age/route of administration)?	Weight and age	Weight and age	Weight	Weight	Weight and age	Weight, age, serum creatinine	Weight and age	Weight	Weight	Weight and age
Is method of administration indicated?	Yes	Yes	Yes	Yes	Yes	Yes	Yes	Yes	Yes	Yes
Number of routes of administration	2	2	2	1	2	1	2	1	5	3
Number of age groups	7	3	1	1	3	9	4	1	1	2
Number of indications (including general dosage)	2	1	3	2	2	1	5	2	2	3
Differentiation between preterm and term patients	Yes	Yes	N/A	No	Yes	Yes	Yes	No	No	No
Are monitoring advice and parameters indicated (if applicable)?	Yes	Yes	Yes	Yes	Yes	Yes	Yes	Yes	Yes	Yes
Renal dosage adjustment (if applicable)	Yes	Yes	Yes	N/A	No	Yes	N/A	No	No	Yes
Hepatic dosage adjustment (if applicable)	N/A	N/A	No	N/A	N/A	N/A	N/A	N/A	Yes	Yes
Other dosage adjustments (if applicable)	N/A	Yes	No	N/A	No	Yes	Yes	Yes	Yes	Yes
Drug-drug interactions mentioned?	Yes	Yes	Yes	No	Yes	Yes	Yes	Yes	Yes	Yes
Adverse effects mentioned?	Yes	Yes	Yes	Yes	Yes	Yes	Yes	Yes	Yes	Yes
If adverse effects are mentioned, are age-specific effects mentioned?	No	No	No	No	No	No	No	No	Yes	No
Are preparation instructions available?	Yes	Yes	Yes	No	Yes	Yes	Yes	Yes	Yes	Yes
Are stability data provided (if applicable)?	Yes	Yes	Yes	Yes	Yes	Yes	Yes	Yes	Yes	Yes
Optimal concentration of preparation (if applicable)	No	No	No	N/A	No	No	No	No	No	N/A
Maximum concentration of preparation (if applicable)	No	N/A	N/A	N/A	N/A	No	N/A	N/A	No	N/A
Are Notable excipients mentioned?	No	Yes	Yes	No	No	Yes	Yes	No	Yes	No
Are commercial products listed?	Yes	Yes	Yes	Yes	Yes	Yes	Yes	Yes	Yes	Yes
Are pharmacokinetic data available?	Yes	Yes	Yes	N/A	Yes	Yes	Yes	Yes	Yes	Yes

## Sheet: Dutch Pediatric Formulary (DPF)
Parameters	Ampicillin	Gentamicin	Caffeine	Poractant alfa	Morphine	Vancomycin	Furosemide	Fentanyl	Midazolam	Acetaminophen (paracetamol)
Is a drug monograph available?	No	Yes	Yes	Yes	Yes	Yes	Yes	Yes	Yes	Yes
Dosage based on which parameter (weight/age/route of administration)?	-	age, route	weight, route	Age, route	age, weight and route	weight, age, route	age, route	weight, age, route	age, and disease (hypothermia), route	weight, age and route
Is method of administration indicated?	-	Yes	Yes	Yes	Yes	Yes	Yes	Yes	Yes	Yes
Number of routes of administration	-	1	2	1	3	1	2	1	3	3
Number of age groups	-	5	1	1	2	4	2	2	2	3
Number of indications (including general dosage)	-	2	1	1	2	1	2	1	3	2
Differentiation between preterm and term patients	-	Yes	N/A	N/A	Yes	Yes	Yes	Yes	Yes	Yes
Are monitoring advice and parameters indicated (if applicable)?	-	Yes	Yes	Yes	Yes	Yes	Yes	Yes	Yes	Yes
Renal dosage adjustment (if applicable)	-	Yes	No	N/A	Yes	No	N/A	N/A	No	No
Hepatic dosage adjustment (if applicable)	-	N/A	No	N/A	N/A	N/A	N/A	N/A	No	No
Other dosage adjustments (if applicable)	-	No	No	N/A	No	No	No	N/A	Yes	No
Drug-drug interactions mentioned?	-	partial	Yes	Yes (N/A)	Yes	Yes	Yes	Yes	Yes	Yes
Adverse effects mentioned?	-	Yes	Yes	Yes	Yes	Yes	Yes	Yes	Yes	Yes
If adverse effects are mentioned, are age-specific effects mentioned?	-	Yes	Yes	Yes	Yes	Yes	Yes	Yes	Yes	No
Are preparation instructions available?	-	No	No	No	No	No	No	No	No	No
Are stability data provided (if applicable)?	-	No	No	No	No	No	No	No	No	No
Optimal concentration of preparation (if applicable)	-	No	No	N/A	No	No	No	No	No	N/A
Maximum concentration of preparation (if applicable)	-	N/A	N/A	N/A	N/A	No	N/A	N/A	No	N/A
Are Notable excipients mentioned?	-	Yes	Yes	N/A	Yes	Yes	Yes	Yes	Yes	Yes
Are commercial products listed?	-	No	No	No	No	No	No	No	No	No
Are pharmacokinetic data available?	-	Yes (TDM)	Yes	N/A	Yes	Yes	Yes	Yes	Yes	Yes
			both caffeine-base	colfosceril
			caffeine-citrate

## Sheet: Neonatal Formulary (NNF)
Parameters	Ampicillin	Gentamicin	Caffeine	Poractant alfa	Morphine	Vancomycin	Furosemide	Fentanyl	Midazolam	Acetaminophen (paracetamol)
Is a drug monograph available?	Yes	Yes	Yes	Yes	Yes	Yes	Yes	Yes	Yes	Yes
Dosage based on which parameter (weight/age/route of administration)?	Weight and age	Weight and age	Weight	Weight	Weight, route of administration, individualized	Age, weight	Weight	Weight	Weight	Weight, age and route
Is method of administration indicated?	Yes	Yes	No	No	Yes	Yes	Yes	Yes	Yes	Yes
Number of routes of administration	3	3	2	1	3	2	3	1	5	3
Number of age groups	3	4	1	1	2	13	1	1	1	3
Number of indications (including general dosage)	2	2	2	1	4	2	3	2	2	3
Differentiation between preterm and term patients	Yes	Yes	N/A	No	No	Yes	Yes	No	No	Yes
Are monitoring advice and parameters indicated (if applicable)?	No	Yes	Yes	No	No	Yes	No	No	Yes	Yes
Renal dosage adjustment (if applicable)	Yes	Yes	No	N/A	No	Yes	N/A	No	No	No
Hepatic dosage adjustment (if applicable)	N/A	N/A	No	N/A	N/A	N/A	N/A	N/A	No	No
Other dosage adjustments (if applicable)	N/A	Yes	Yes	N/A	Yes	Yes	No	Yes	No	Yes
Drug-drug interactions mentioned?	No	No	No	No	No	No	Yes	No	No	No
Adverse effects mentioned?	Yes	No	No	No	Yes	No	No	No	Yes	No
If adverse effects are mentioned, are age-specific effects mentioned?	No	No	No	No	No	No	No	No	No	No
Are preparation instructions available?	Yes	No	No	Yes	Yes	Yes	Yes	Yes	Yes	Yes
Are stability data provided (if applicable)?	Yes	No	No	Yes	Yes	No	No	No	Yes	Yes
Optimal concentration of preparation (if applicable)	No	No	No	N/A	No	No	Yes	Yes	No	N/A
Maximum concentration of preparation (if applicable)	No	N/A	N/A	N/A	N/A	No	N/A	N/A	No	N/A
Are Notable excipients mentioned?	Yes	No	No	No	No	No	Yes	No	Yes	Yes
Are commercial products listed?	No	No	Yes	No	Yes	No	No	No	Yes	No
Are pharmacokinetic data available?	No	No	Yes	N/A	Yes	Yes	Yes	Yes	Yes	Yes

## Sheet: Pediatric & Neonatal Lexi-Drugs
Parameters	Ampicillin	Gentamicin	Caffeine	Poractant alfa	Morphine	Vancomycin	Furosemide	Fentanyl	Midazolam	Acetaminophen (paracetamol)
Is a drug monograph available?	Yes	Yes	Yes	Yes	Yes	Yes	Yes	Yes	Yes	Yes
Dosage based on which parameter (weight/age/route of administration)?	Weight and age	Weight and age	Weight, age	Weight	Weight	Weight, age, serum creatinine	Weight and age	Weight, age	Weight, age	Weight, age and route
Is method of administration indicated?	Yes	Yes	Yes	Yes	Yes	Yes	Yes	Yes	Yes	Yes
Number of routes of administration	2	4	2	1	4	3	3	3	2	3
Number of age groups	10	6	2	2	1	8	3	2	3	Many (depending on route and indication)
Number of indications (including general dosage)	4	3	1	1	3	3	2	3	3	4
Differentiation between preterm and term patients	Yes	Yes	N/A	Yes	Yes	Yes	Yes	Yes	Yes	Yes
Are monitoring advice and parameters indicated (if applicable)?	Yes	Yes	Yes	Yes	Yes	Yes	Yes	Yes	Yes	Yes
Renal dosage adjustment (if applicable)	Yes	Yes	Yes	N/A	Yes	Yes	N/A	Yes	No	Yes
Hepatic dosage adjustment (if applicable)	N/A	N/A	Yes	N/A	N/A	N/A	N/A	N/A	No	Yes
Other dosage adjustments (if applicable)	N/A	Yes	No	N/A	Yes	Yes	No	Yes	Yes	No
Drug-drug interactions mentioned?	Yes	Yes	Yes	Yes	Yes	Yes	Yes	Yes	Yes	Yes
Adverse effects mentioned?	Yes	Yes	Yes	Yes	Yes	Yes	Yes	Yes	Yes	Yes
If adverse effects are mentioned, are age-specific effects mentioned?	Yes	Yes	Yes	Yes	Yes	No	Yes	Yes	Yes	Yes
Are preparation instructions available?	Yes	Yes	Yes	Yes	Yes	Yes	Yes	Yes	Yes	Yes
Are stability data provided (if applicable)?	Yes	Yes	Yes	Yes	Yes	Yes	Yes	Yes	Yes	Yes
Optimal concentration of preparation (if applicable)	No	Yes	Yes	N/A	Yes	Yes	Yes	Yes	Yes	N/A
Maximum concentration of preparation (if applicable)	Yes	N/A	N/A	N/A	N/A	Yes	N/A	N/A	Yes	N/A
Are Notable excipients mentioned?	Yes	No	Yes	Yes	Yes	Yes	Yes	Yes	Yes	Yes
Are commercial products listed?	Yes	Yes	Yes	Yes	Yes	Yes	Yes	Yes	Yes	Yes
Are pharmacokinetic data available?	Yes	Yes	Yes	N/A	Yes	Yes	Yes	Yes	Yes	Yes

## Sheet: BNF for Children
Parameters	Ampicillin	Gentamicin	Caffeine	Poractant alfa	Morphine	Vancomycin	Furosemide	Fentanyl	Midazolam	Acetaminophen (paracetamol)
Is a drug monograph available?	Yes	Yes	Yes	Yes	Yes	Yes	Yes	Yes	Yes	Yes
Dosage based on which parameter (weight/age/route of administration)?	Weight, age	Weight and age	Weight	Weight	Weight, age, route of administration	Age, weight	Weight and age	Weight	Weight, age	Weight, age and route
Is method of administration indicated?	Yes	Yes	Yes	No	Yes	Yes	Yes	No	Yes	Yes
Number of routes of administration	2	1	2	1	5	5	2	1	2	3
Number of age groups	5	2	1	1	1	4	2	1	3	3
Number of indications (including general dosage)	3	1	1	2	3	Many	3	2	3	2
Differentiation between preterm and term patients	Yes	No	N/A	No	No	Yes	Yes	No	Yes	Yes
Are monitoring advice and parameters indicated (if applicable)?	No	Yes	Yes	No	Yes	Yes	Yes	Yes	Yes	No
Renal dosage adjustment (if applicable)	Yes	Yes	Yes	N/A	Yes	Yes	N/A	Yes	Yes	Yes
Hepatic dosage adjustment (if applicable)	N/A	N/A	Yes	N/A	N/A	N/A	N/A	N/A	Yes	Yes
Other dosage adjustments (if applicable)	N/A	No	No	N/A	No	No	No	No	No	No
Drug-drug interactions mentioned?	Yes	Yes	Yes	No	Yes	Yes	Yes	Yes	Yes	Yes
Adverse effects mentioned?	Yes	Yes	Yes	Yes	Yes	Yes	Yes	Yes	Yes	Yes
If adverse effects are mentioned, are age-specific effects mentioned?	No	No	No	No	No	No	No	Yes	No	No
Are preparation instructions available?	Yes	Yes	No	No	Yes	Yes	Yes	Yes	Yes	Yes
Are stability data provided (if applicable)?	No	No	No	No	No	No	No	No	No	No
Optimal concentration of preparation (if applicable)	No	No	No	N/A	No	No	Yes	No	Yes	N/A
Maximum concentration of preparation (if applicable)	No	N/A	N/A	N/A	N/A	Yes	N/A	N/A	Yes	N/A
Are Notable excipients mentioned?	No	No	No	No	No	No	Yes	No	No	No
Are commercial products listed?	Yes	Yes	Yes	Yes	Yes	Yes	Yes	Yes	Yes	Yes
Are pharmacokinetic data available?	No	No	Yes	N/A	No	Yes	No	No	No	No
